# Supplementary material
Source: MDPI journal article supplement (https://www.mdpi.com/1424-8247/16/12/1706)

## SUPPLEMENTARY MATERIAL

# N-Substituted 2-(benzenosulfonyl)-1-carbotioamide derivatives exert antimicrobial and cytotoxic effects via aldehyde dehydrogenase pathway; synthesis, *in silico* and *in vitro* studies

Lucja Justyna Walczak-Nowicka <sup>1</sup>, Anna Biernasiuk <sup>2</sup>, Wojciech Ziemichód <sup>3</sup>, Zbigniew Karczmarzyk <sup>4</sup>, Mateusz Kwaśnik <sup>5</sup>, Paweł Kozyra <sup>3</sup>, Waldemar Wysocki <sup>4</sup>, Agnieszka Stenzel-Bembenek <sup>6</sup>, Dorota Kowalczuk <sup>7</sup>, Mariola Herbet <sup>1</sup> and Monika Pitucha <sup>3,\*</sup>

<sup>1</sup> Chair and Department of Toxicology, Faculty of Pharmacy, Medical University of Lublin, Jaczewskiego 8b, 20-090 Lublin, Poland

<sup>2</sup> Department of Pharmaceutical Microbiology, Faculty of Pharmacy, Medical University of Lublin, Chodzki 1, 20-093 Lublin, Poland

<sup>3</sup> Independent Radiopharmacy Unit, Faculty of Pharmacy, Medical University of Lublin, Chodzki 4a, 20-093 Lublin, Poland

<sup>4</sup> Institute of Chemistry, University of Siedlce, 3 Maja 54, 08-110 Siedlce, Poland

<sup>5</sup> Department of Molecular Biology, Faculty of Medicine, The John Paul II Catholic University of Lublin, Konstantynów 1J/4.03, 20-708 Lublin, Poland

<sup>6</sup> Department of Biochemistry and Molecular Biology, Faculty of Medical Sciences, Medical University of Lublin, Chodzki 1, 20-093 Lublin, Poland

<sup>7</sup> Department of Medicinal Chemistry, Faculty of Pharmacy, Medical University of Lublin, Jaczewskiego 4, 20-090, Lublin, PL, Poland

\* Correspondence: monika.pitucha@umlub.pl (MP);

**Figure S1.** NMR spectra for WZ1

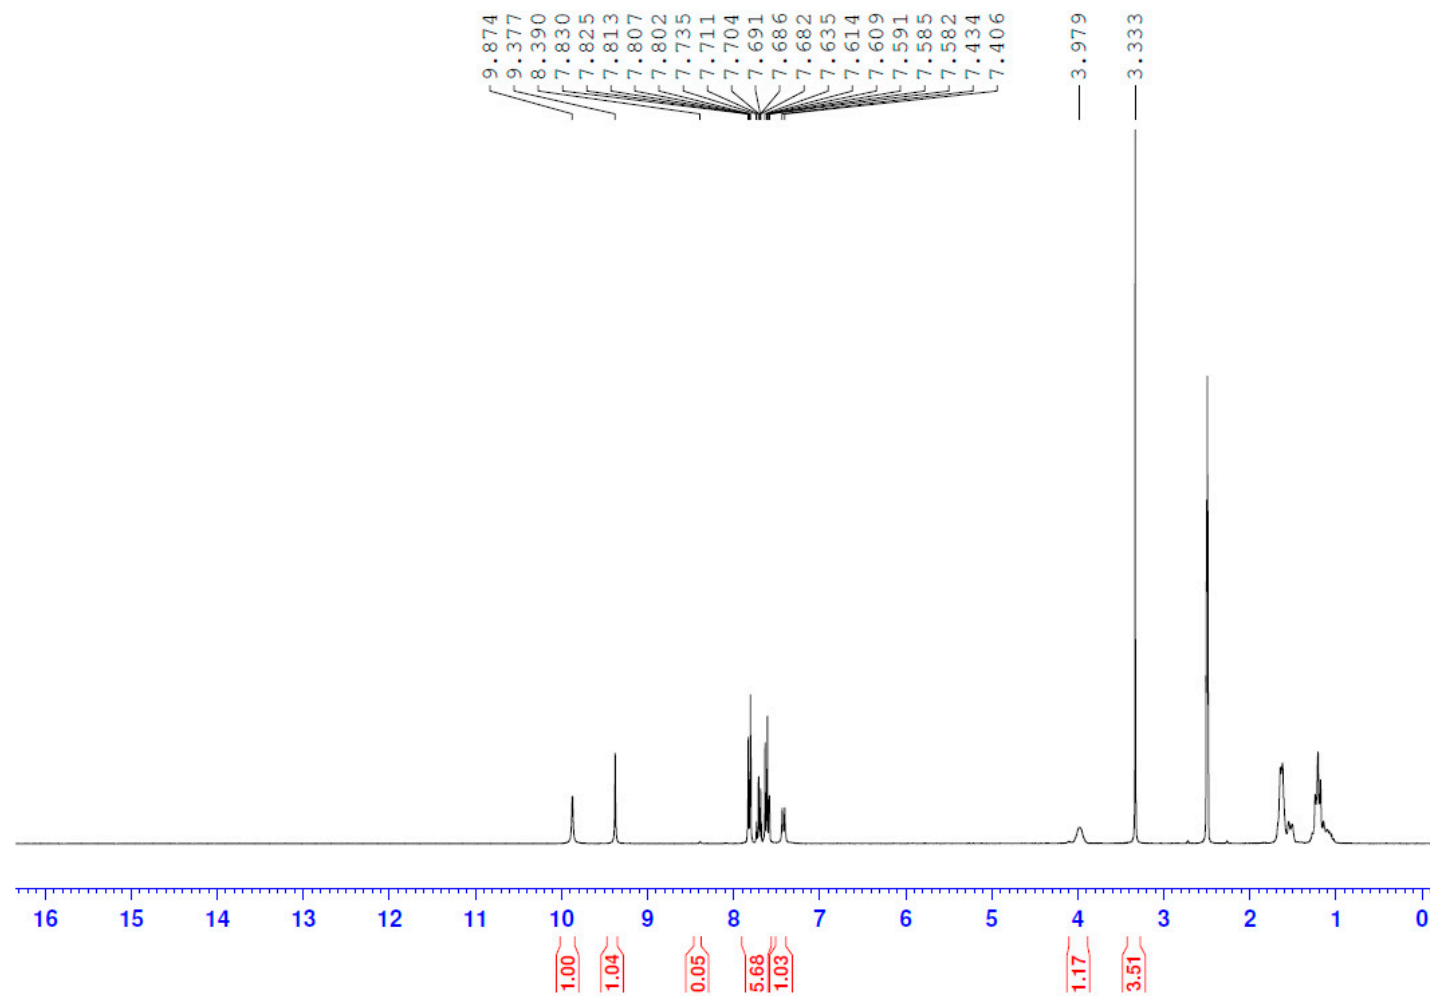

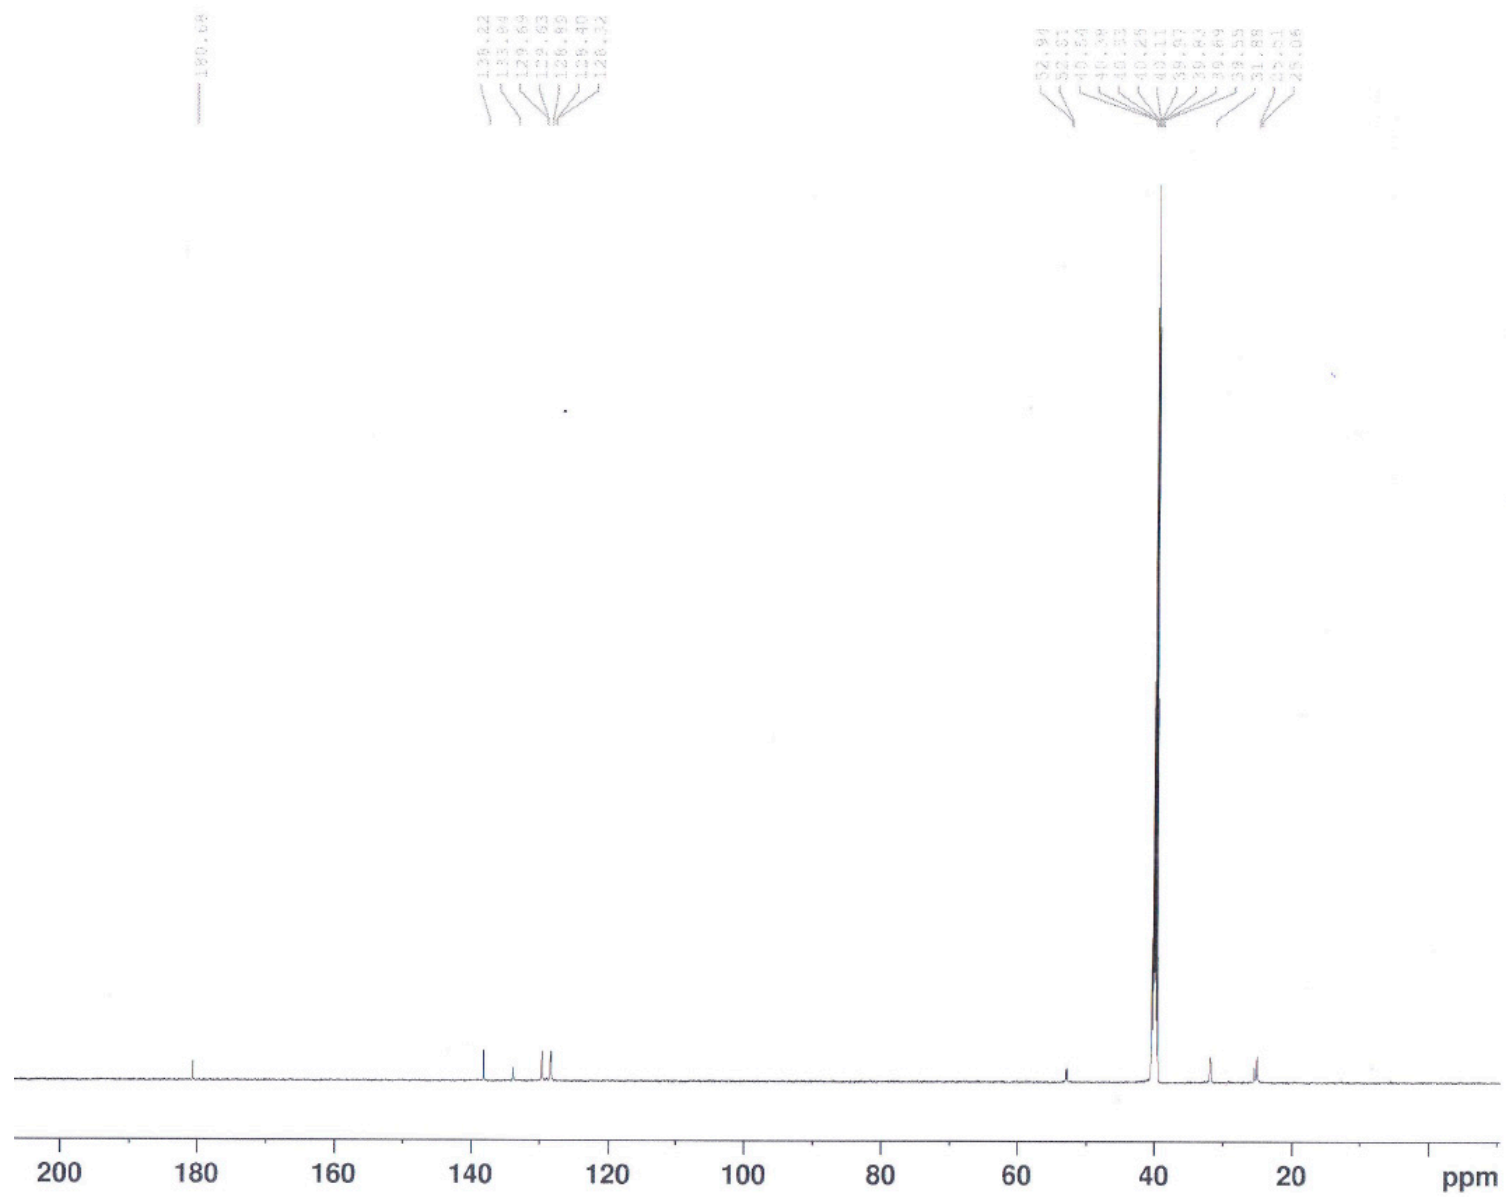

**Figure S2.** NMR spectra for WZ-2

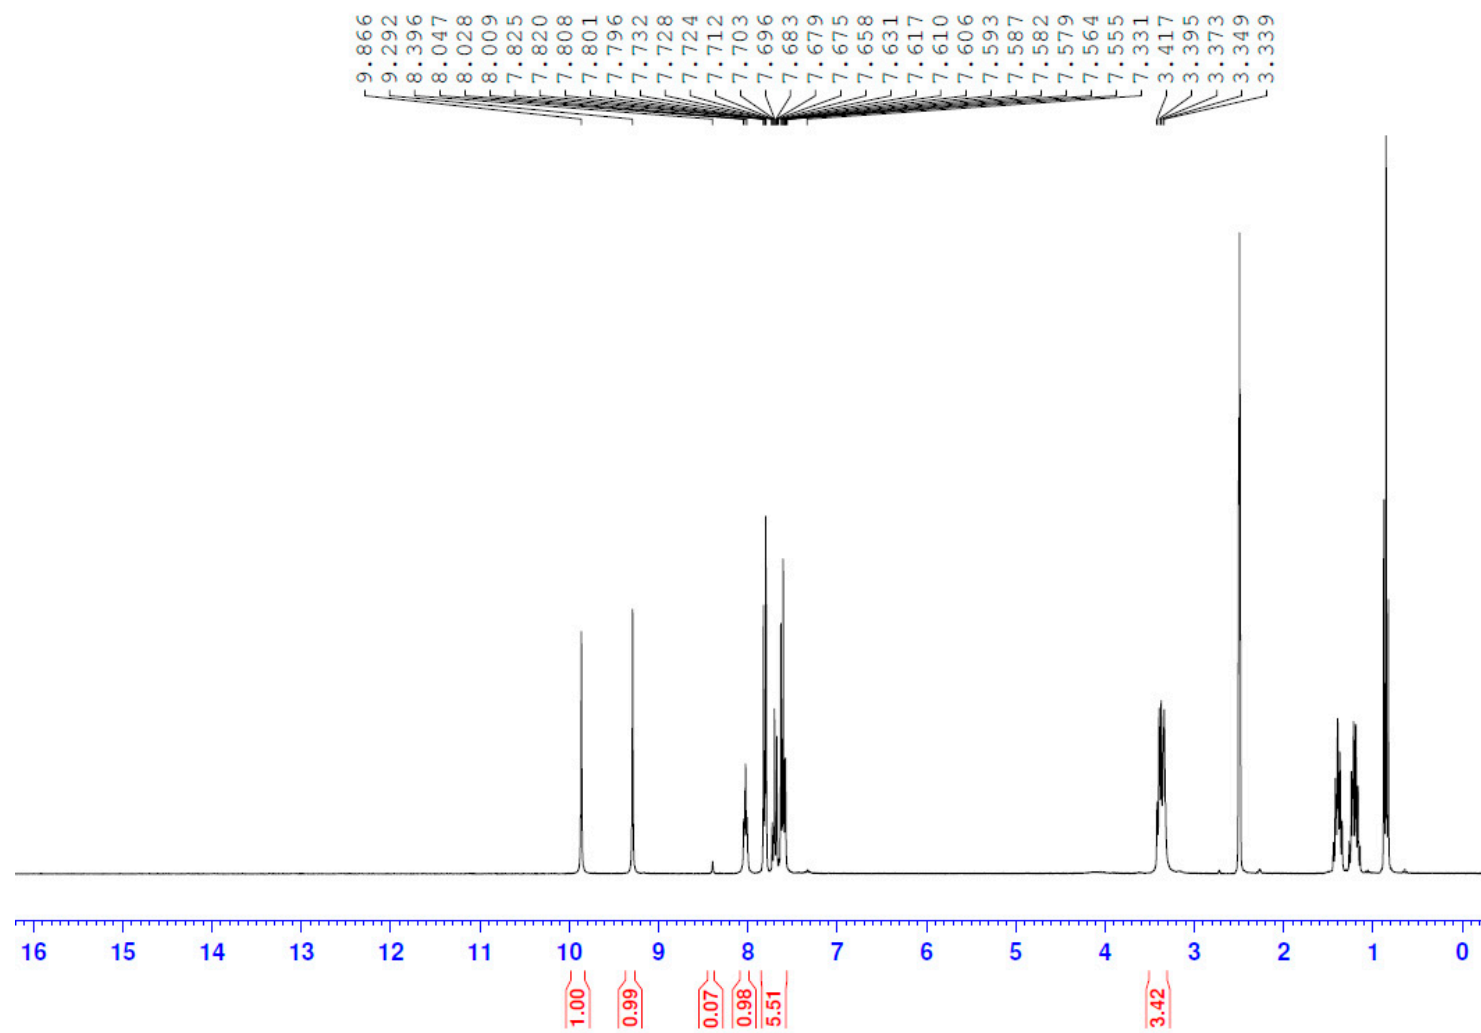

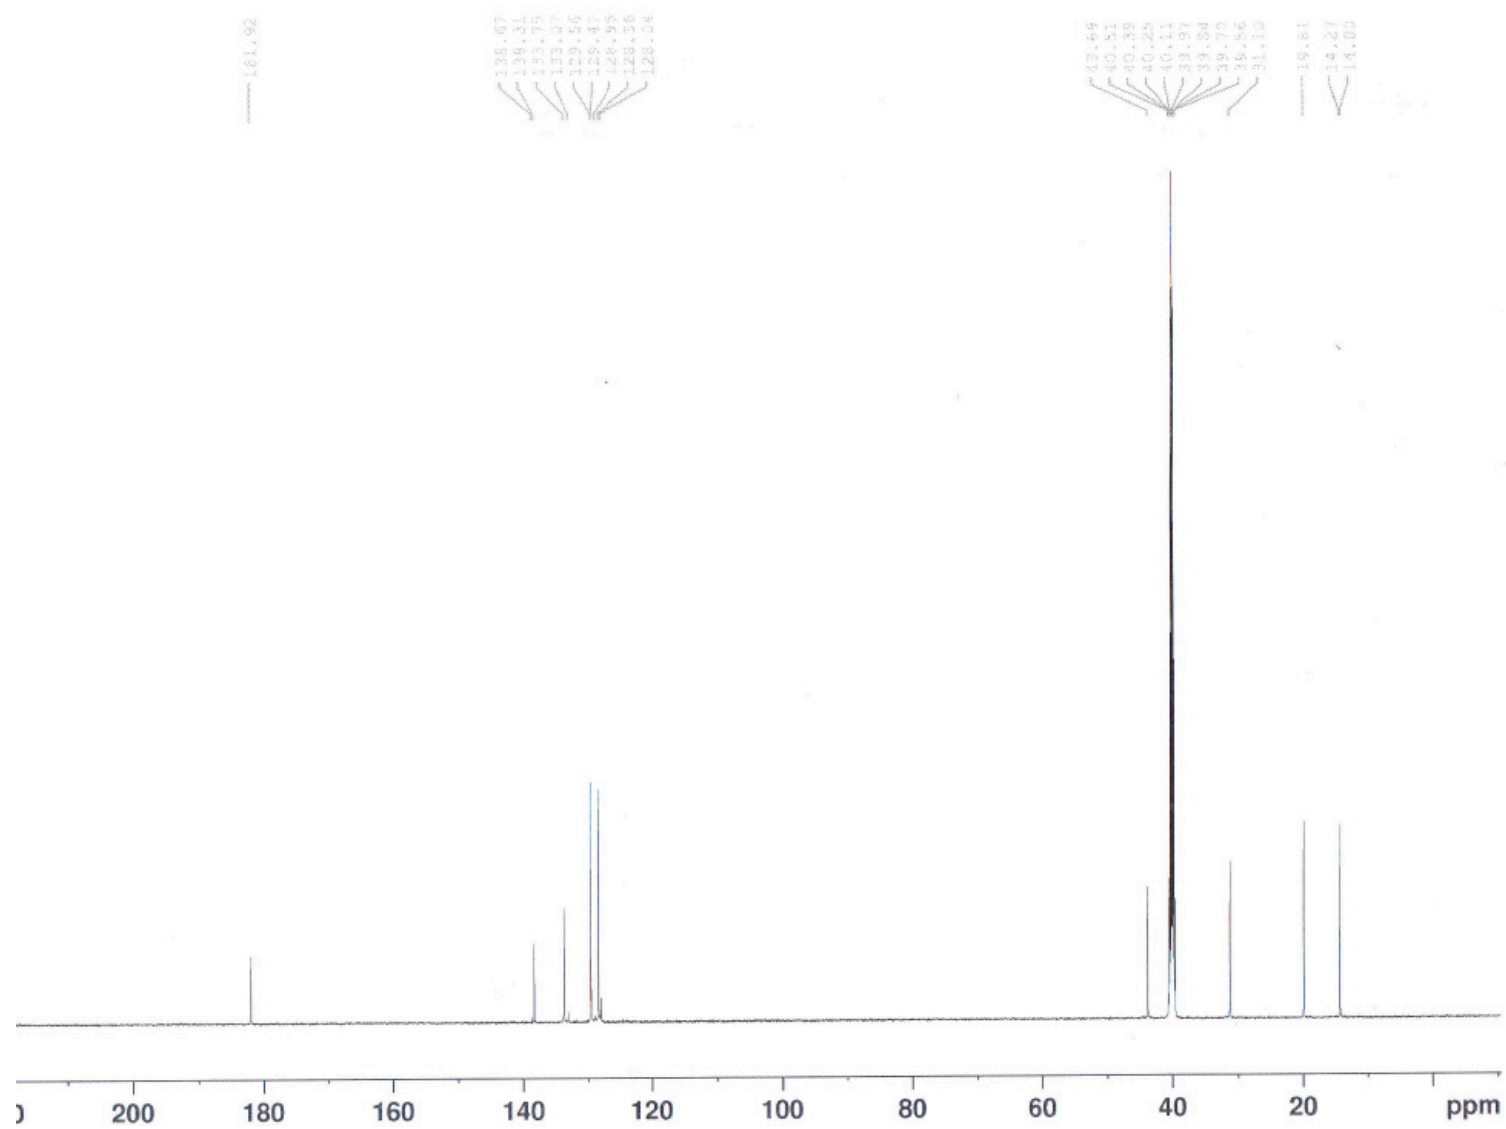

**Figure S3.** NMR spectra for WZ-3

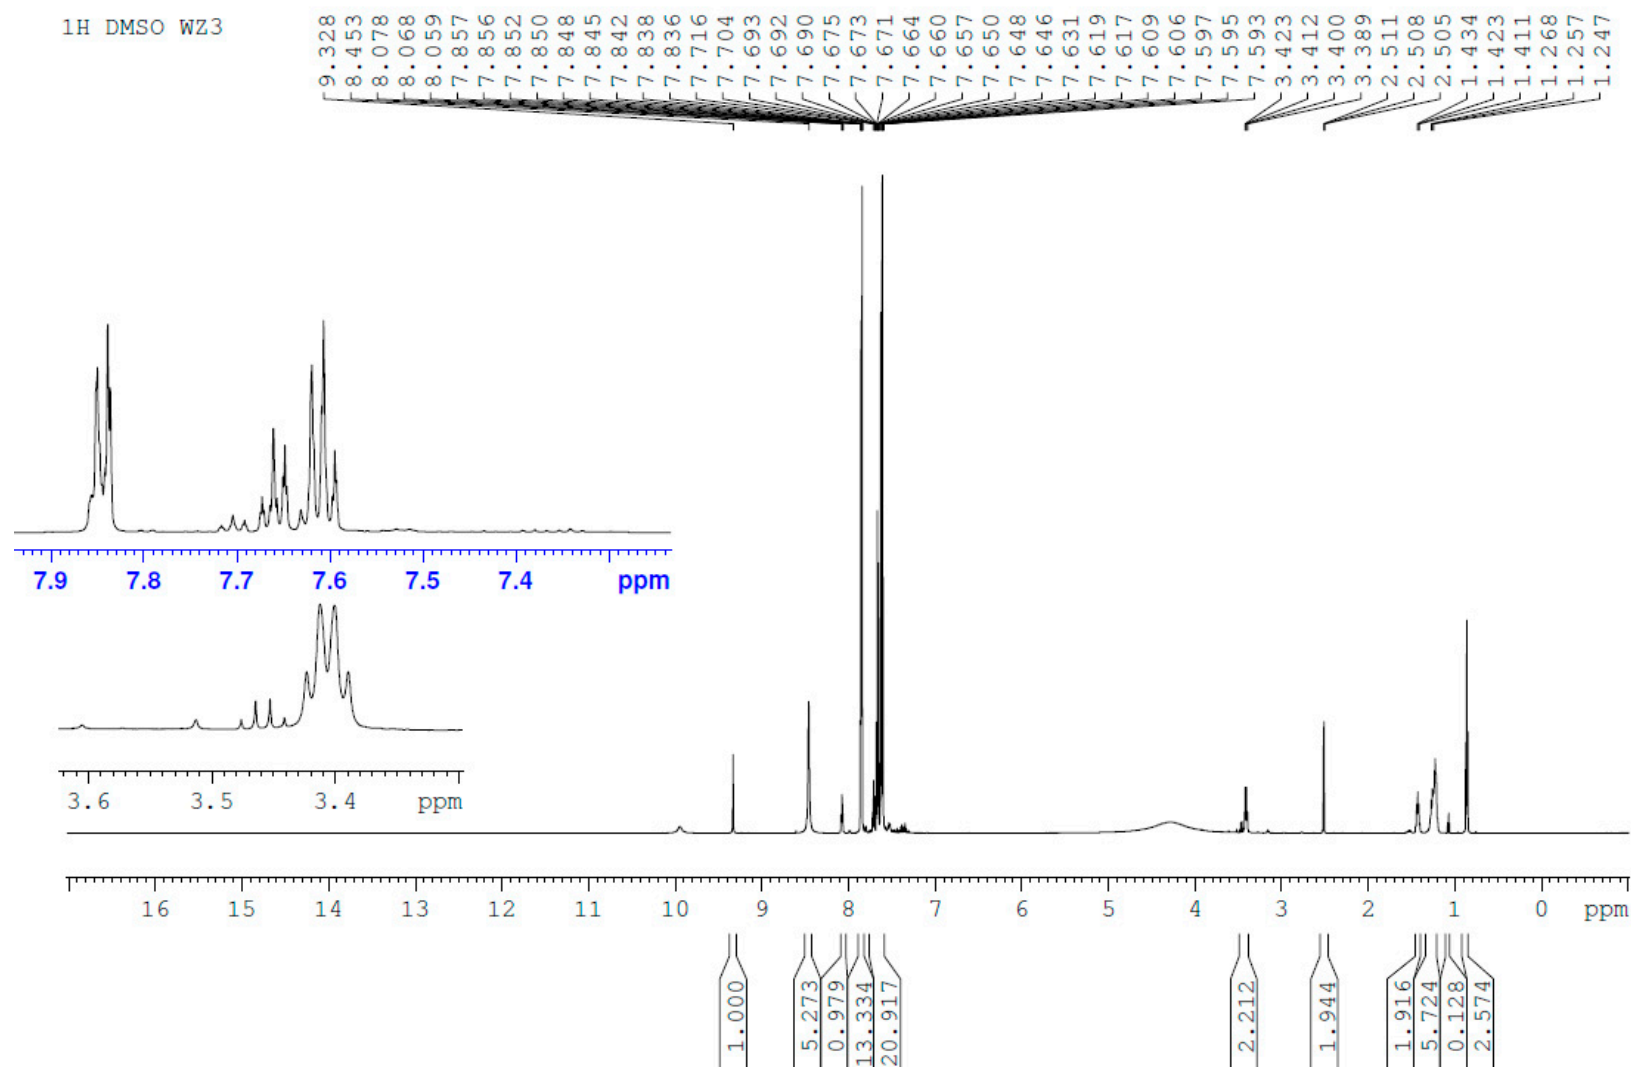

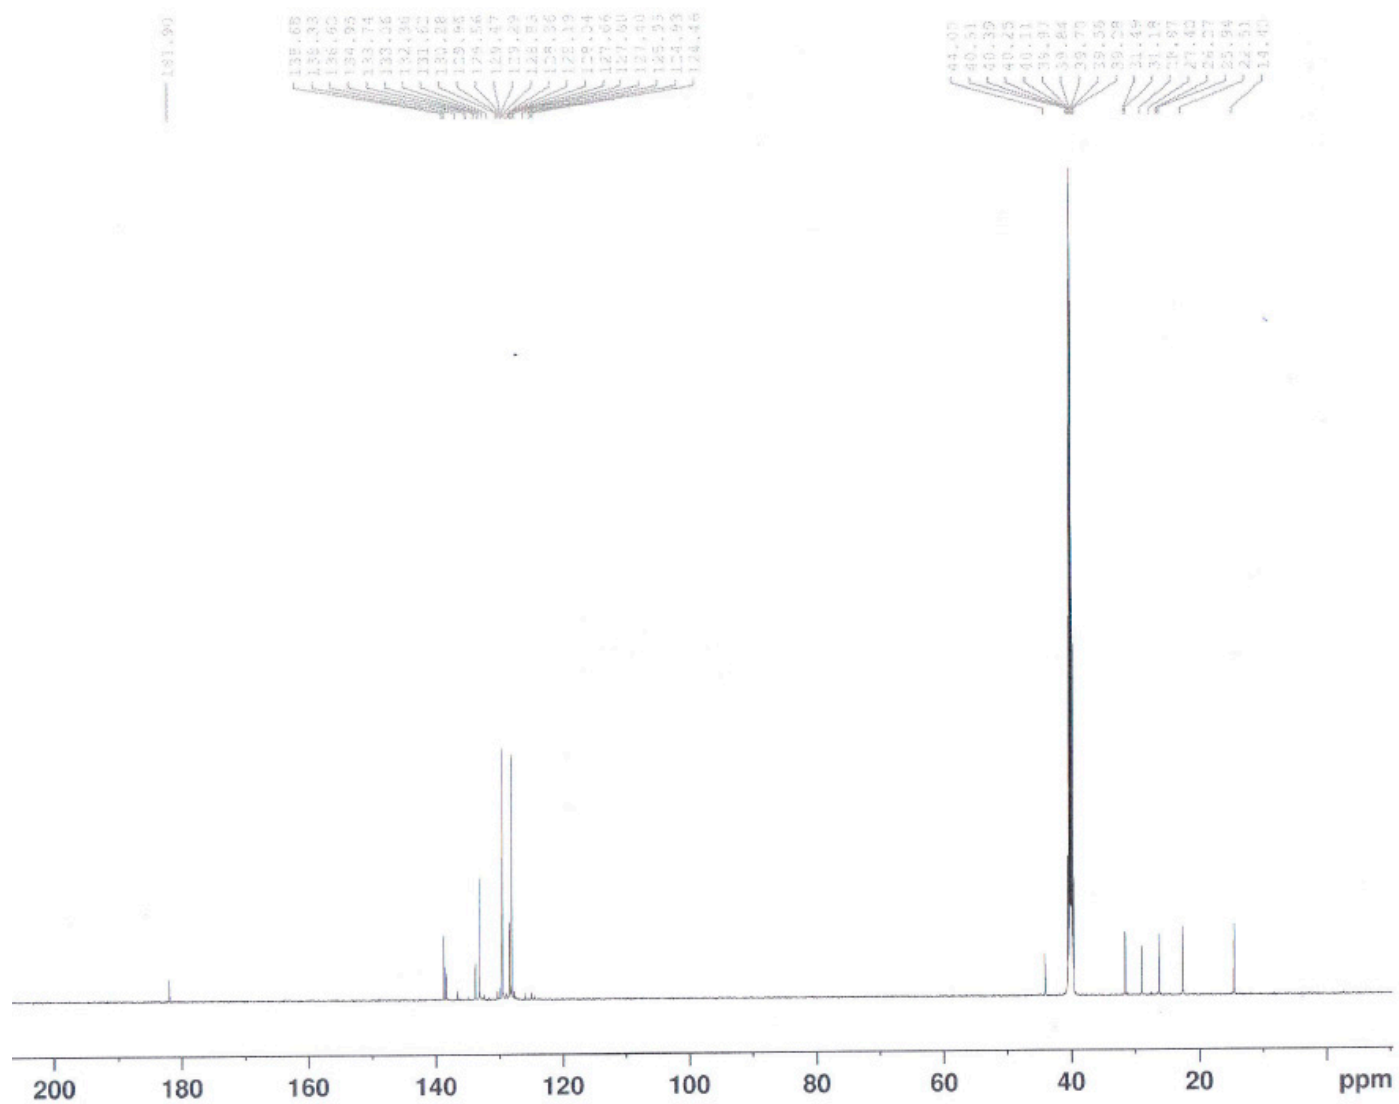

**Figure S4.** NMR spectra for WZ-4

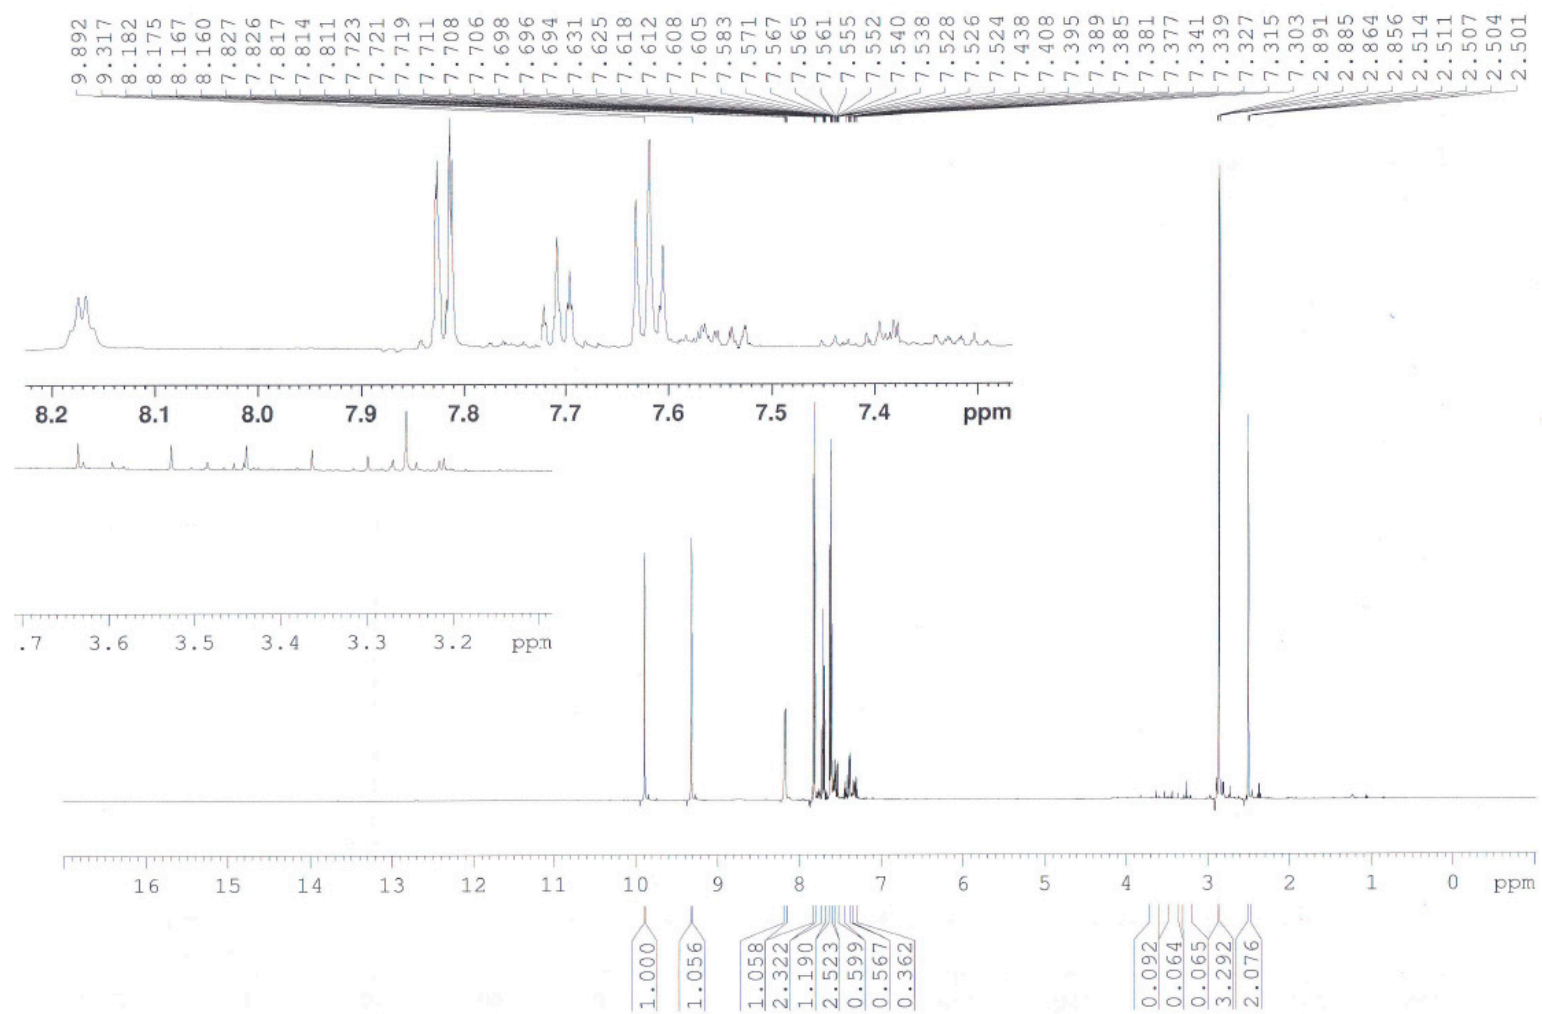



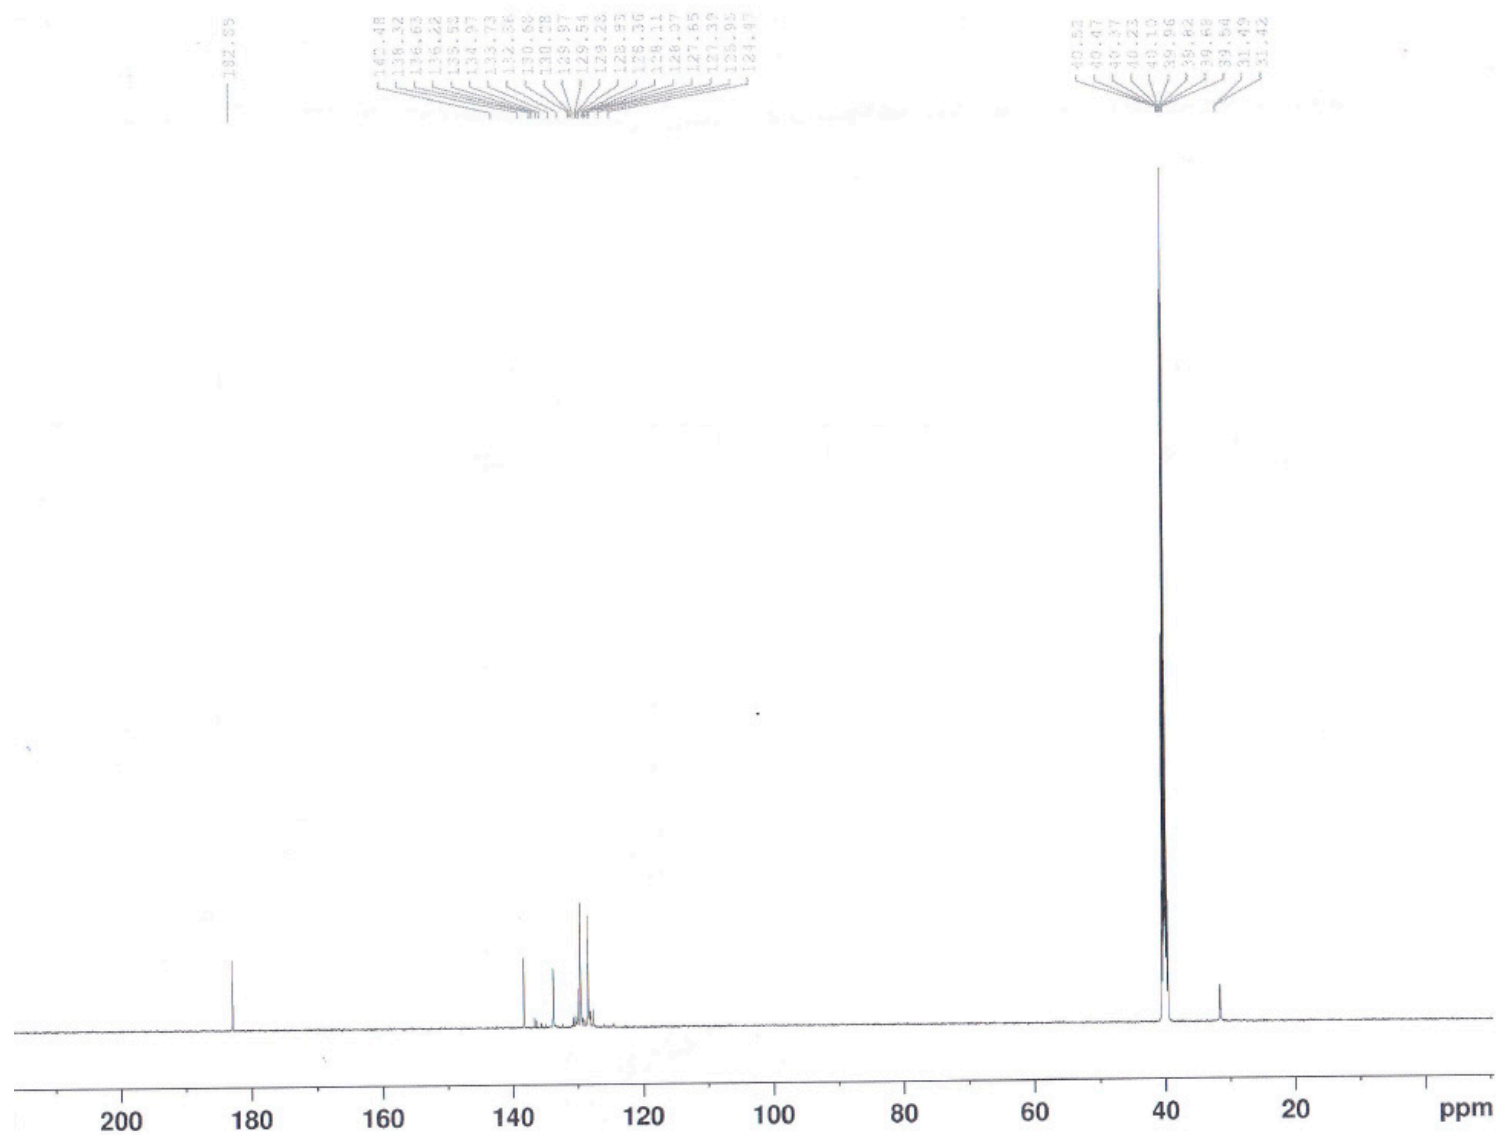

**Figure S5.** MS spectra for compounds WZ1-WZ-4

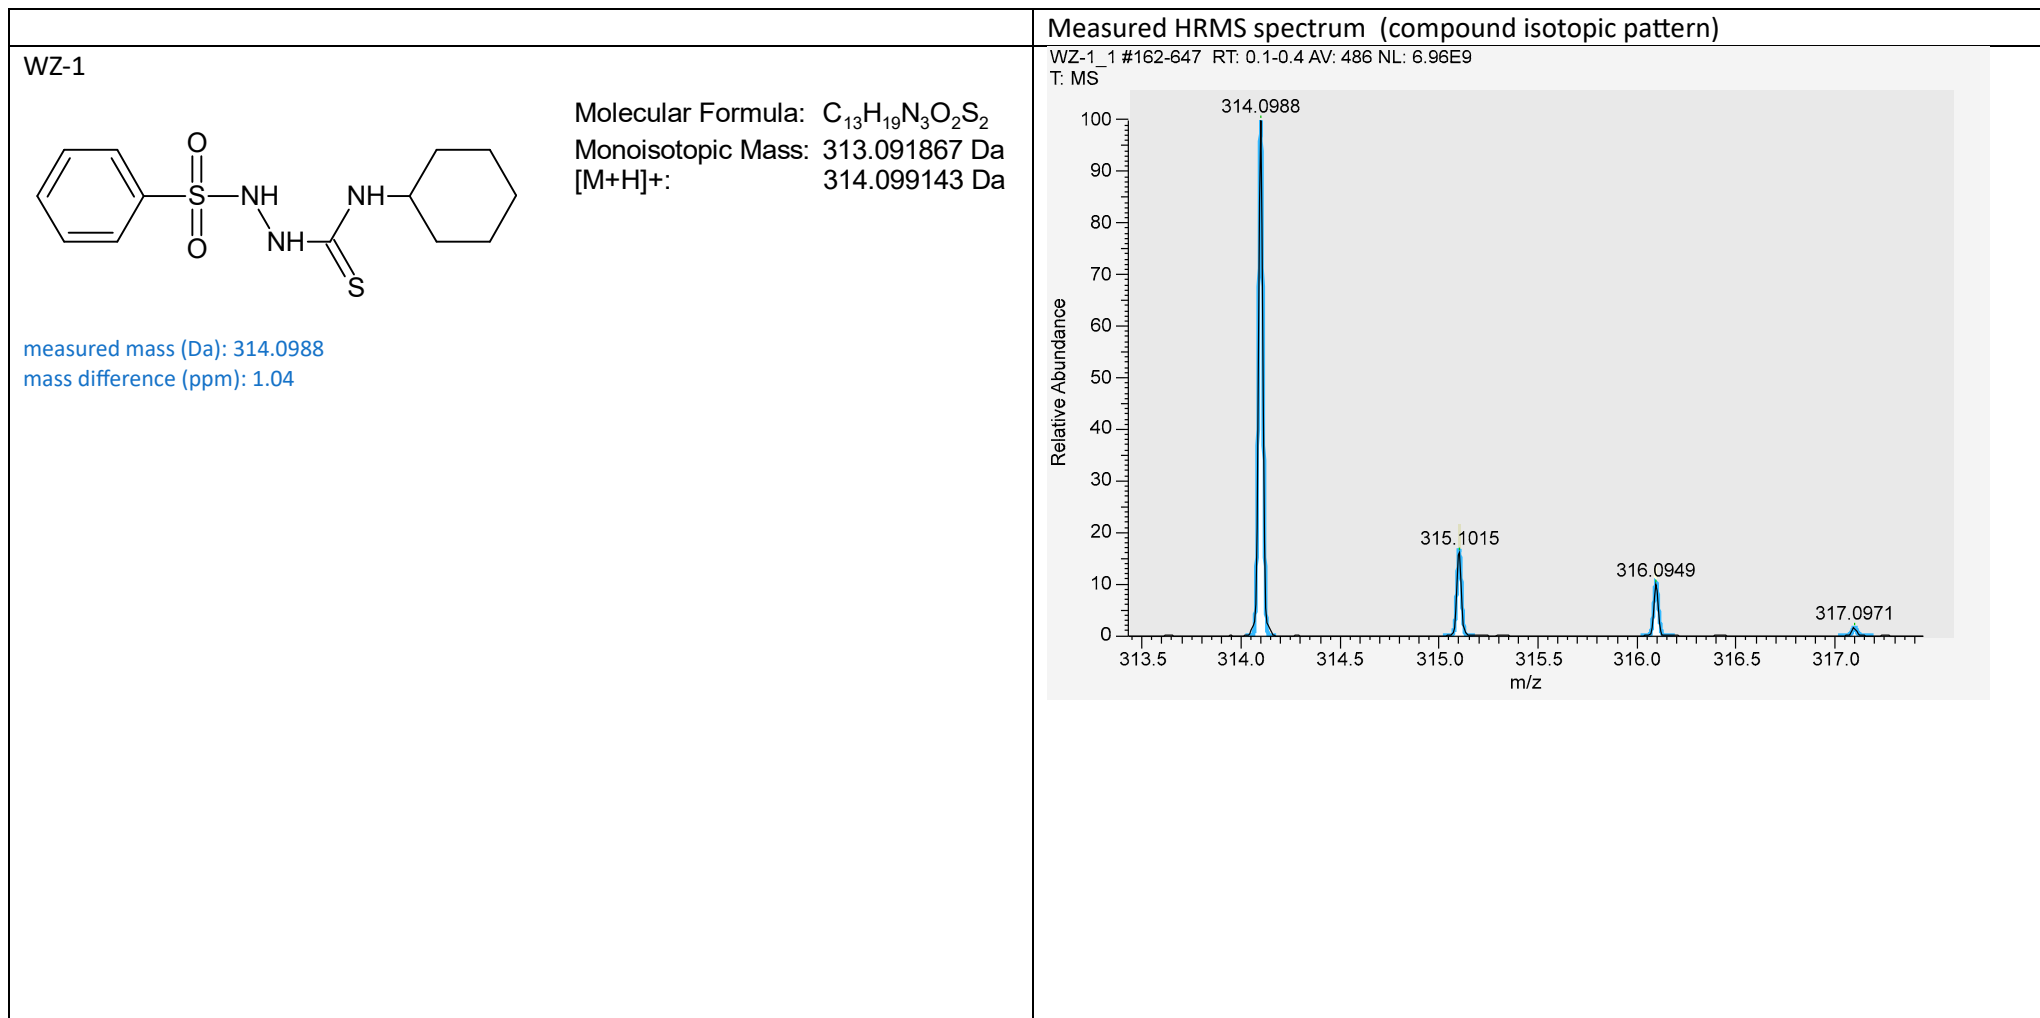

WZ-2

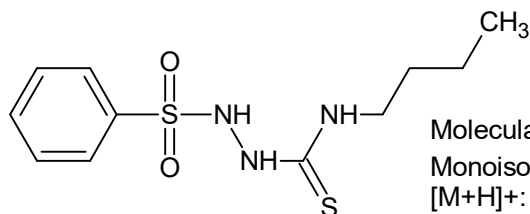

Molecular Formula:  $C_{11}H_{17}N_3O_2S_2$   
Monoisotopic Mass: 287.076217 Da  
[M+H]<sup>+</sup>: 288.083493 Da

measured mass (Da): 288.0832  
mass difference (ppm): 1.15

WZ-2\_1 #160-648 RT: 0.1-0.4 AV: 489 NL: 5.21E9  
T: MS

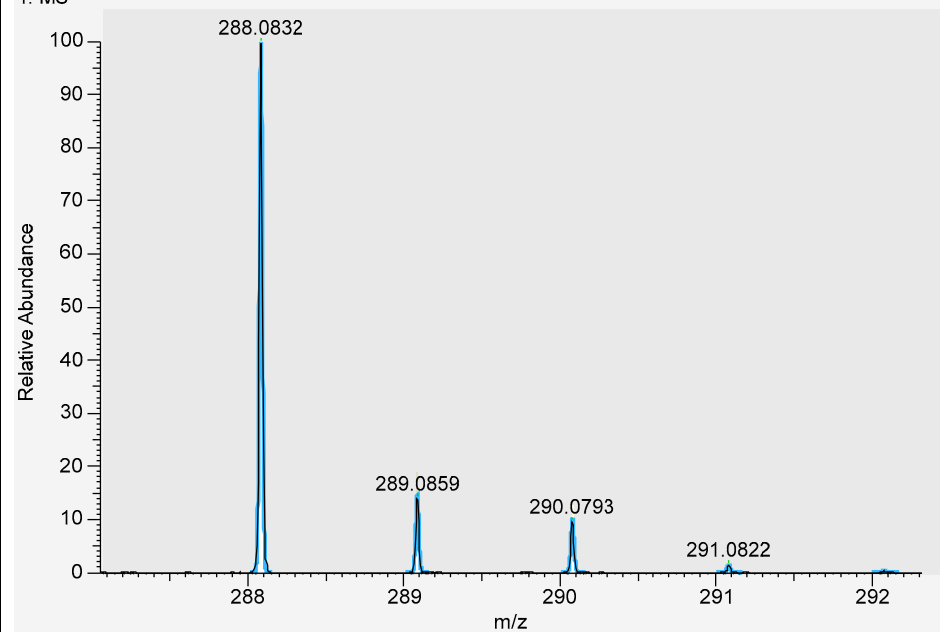

WZ-3

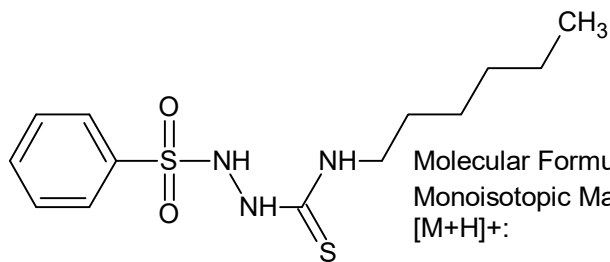

Molecular Formula: C<sub>13</sub>H<sub>21</sub>N<sub>3</sub>O<sub>2</sub>S<sub>2</sub>  
Monoisotopic Mass: 315.107517 Da  
[M+H]<sup>+</sup>: 316.114793 Da

measured mass (Da): 316.1145  
mass difference (ppm): 0.87

WZ-3\_1 #162-650 RT: 0.1-0.4 AV: 489 NL: 5.26E9  
T: MS

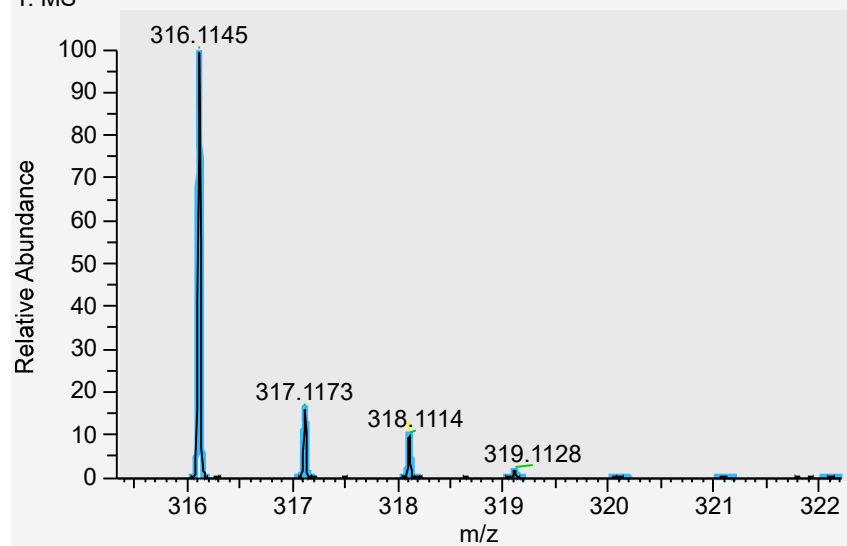

WZ-4

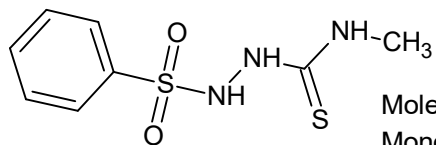

Molecular Formula:  $\text{C}_8\text{H}_{11}\text{N}_3\text{O}_2\text{S}_2$   
Monoisotopic Mass: 245.029267 Da  
[M+H]<sup>+</sup>: 246.036543 Da

measured mass (Da): 246.0365  
mass difference (ppm): 0.01

WZ-4\_1 #162-648 RT: 0.1-0.4 AV: 487 NL: 3.50E9  
T: MS

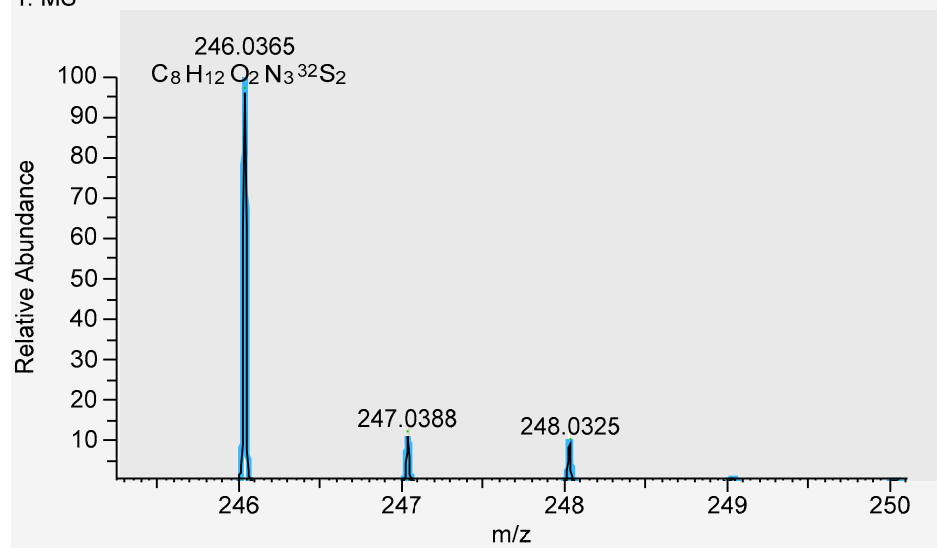

Supplement: s1 [file s1]
